# Supplementary material
Source: publisher figshare collection journal article supplement (https://acs.figshare.com/ndownloader/files/6511710)
Supplement: Supplementary file 1 [file 6511710]

## Supporting Information

### Porous Hafnium Phosphonate: Novel Heterogeneous Catalyst for Conversion of Levulinic Acid and Esters into $\gamma$ -Valerolactone

Chao Xie,<sup>†,‡</sup> Jinliang Song,<sup>\*,†</sup> Baowen Zhou,<sup>†,‡</sup> Jiayin Hu,<sup>†,‡</sup> Zhanrong Zhang,<sup>†</sup> Pei Zhang,<sup>†</sup> Zhiwei Jiang,<sup>†</sup> and Buxing Han<sup>\*,†,‡</sup>

<sup>†</sup>*Beijing National Laboratory for Molecular Sciences, Institute of Chemistry, Chinese Academy of Sciences, No. 2 Zhongguancun North First Street, Haidian District, Beijing 100190, P.R.China*

<sup>‡</sup>*University of Chinese Academy of Sciences, 19A Yuquan Road, Shijingshan District, Beijing 100049, P.R.China*

**E-mail:** songjl@iccas.ac.cn; hanbx@iccas.ac.cn

## Table of Contents

|                   |    |
|-------------------|----|
| 1. Table S1.....  | S2 |
| 2. Figure S1..... | S2 |
| 3. Scheme S1..... | S2 |
| 4. Figure S2..... | S3 |
| 5. Figure S3..... | S3 |
| 6. Figure S4..... | S4 |
| 7. Figure S5..... | S4 |

**Table S1.** Physical properties of different catalysts.

| Sample <sup>a</sup> | BET surface area (m <sup>2</sup> g <sup>-1</sup> ) <sup>b</sup> | Pore volume (cm <sup>3</sup> g <sup>-1</sup> ) <sup>c</sup> | Pore diameter (nm) <sup>d</sup> |
|---------------------|-----------------------------------------------------------------|-------------------------------------------------------------|---------------------------------|
| Hf-ATMP             | 222.6                                                           | 0.25                                                        | 16.7                            |
| HfO <sub>2</sub>    | 6.74                                                            | 0.07                                                        | --                              |
| Hf-EDPA             | 206.8                                                           | 0.39                                                        | 13.9                            |
| Cr-ATMP             | 4.81                                                            | 0.03                                                        | 15.8                            |
| Zn-ATMP             | 31.71                                                           | 0.13                                                        | 47.3                            |
| Al-ATMP             | 62.54                                                           | 0.36                                                        | 41.4                            |
| Cu-ATMP             | 129.86                                                          | 0.14                                                        | 3.6                             |

<sup>a</sup>The samples were degassed at 120 °C for 24 h. <sup>b</sup>Surface area based on multipoint BET method. <sup>c</sup>Pore volume based on BJH method. <sup>d</sup>Pore diameter based on BJH method.

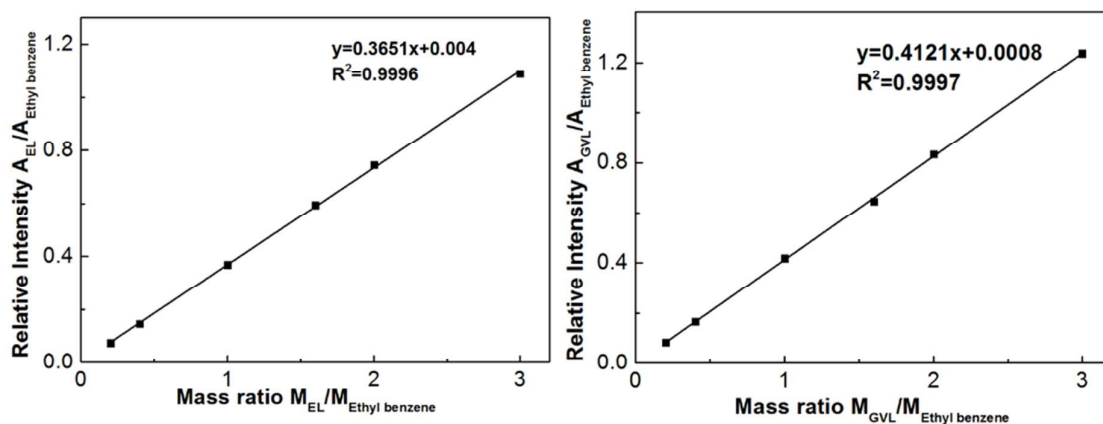

**Figure S1.** The calibration curves for GC using 0.05g ethylbenzene as the internal standard. (A=Peak area, M=Weight)

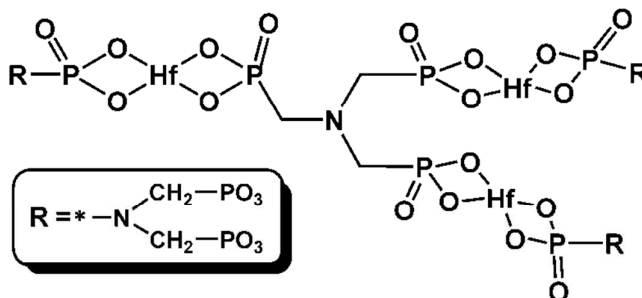

**Scheme S1.** The most plausible connectivity pattern between ATMP and Hf<sup>4+</sup>.

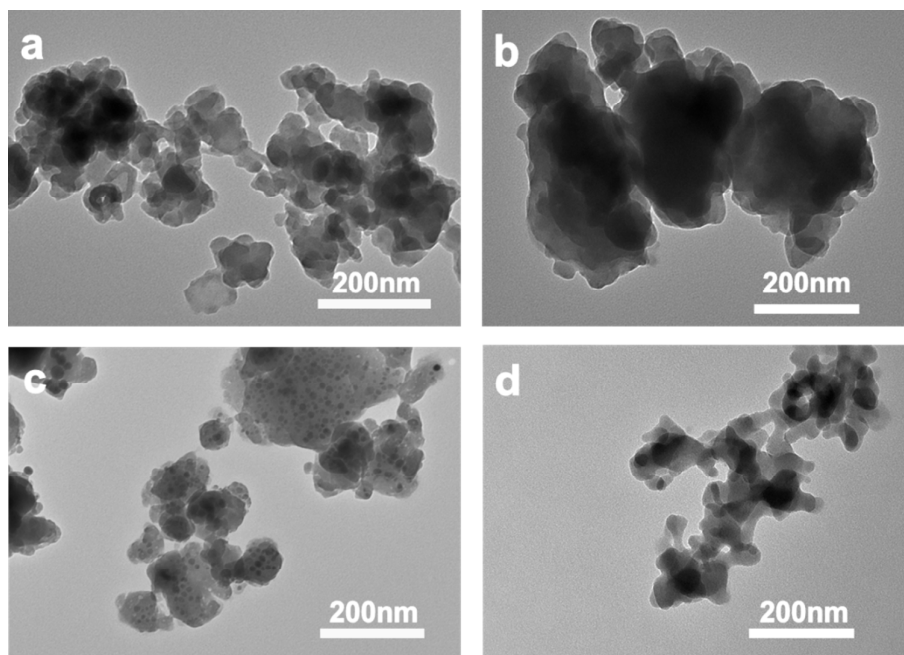

**Figure S2.** The TEM images of Al-ATMP (a), Cr-ATMP (b), Cu-ATMP (c), and Zn-ATMP (d).

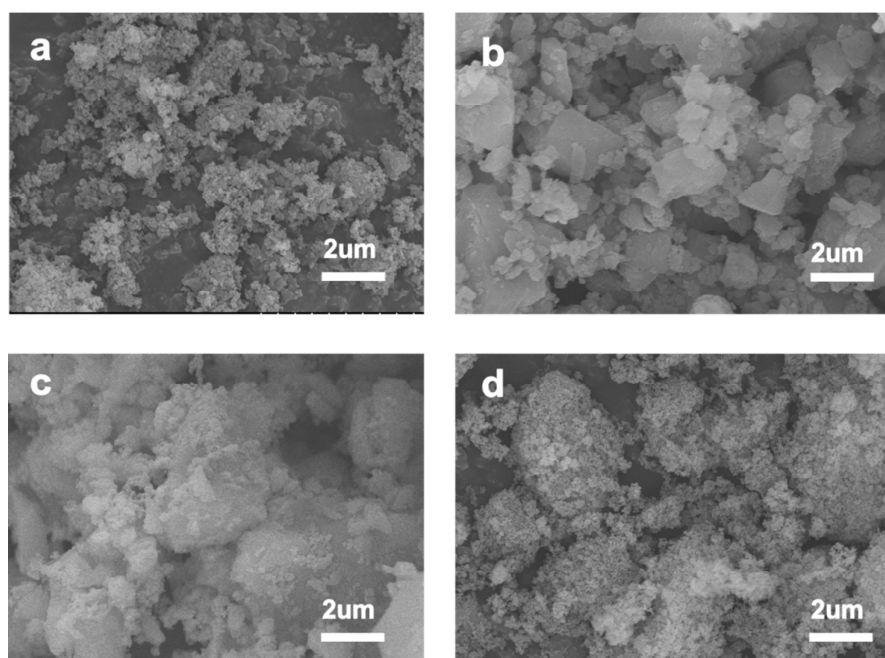

**Figure S3.** The SEM images of Al-ATMP (a), Cr-ATMP (b), Cu-ATMP (c), and Zn-ATMP (d).

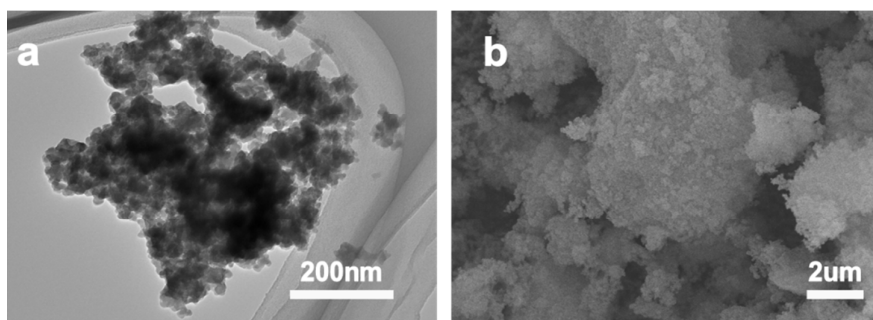

**Figure S4.** The TEM (a) and SEM (b) images of Hf-EDPA.

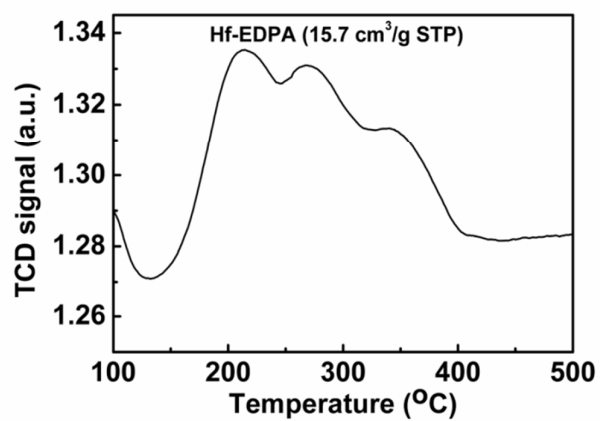

**Figure S5.** CO<sub>2</sub>-TPD examination for Hf-EDPA.
